# Supplementary material for: A critical evaluation of short columns for estimating the attachment efficiency of engineered nanomaterials in natural soils
Source: Royal Society of Chemistry journal article supplement (doi:10.1039/d0en01089h), 2021-01-01
Supplement: d0en01089h1.pdf [file d0en01089h1.pdf]

## Supporting info for

# A critical evaluation of short columns for estimating the attachment efficiency of engineered nanomaterials in natural soils

Knapp Karin Norrfors<sup>1</sup>, Micic Batka Vesna<sup>2</sup>, Olga Borovinskaya<sup>3</sup>, Frank von der Kammer<sup>2</sup>, Thilo Hoffman<sup>2</sup> and Geert Cornelis<sup>1\*</sup>

<sup>1</sup>Department of Soil and Environment, SLU Swedish University of Agricultural Sciences, PO Box 7014, SE-75007 Uppsala, Sweden

<sup>2</sup> Department of Environmental Geosciences, Centre for Microbiology and Environmental Systems Science, University of Vienna, Althanstrasse 14, 1090 Vienna, Austria

<sup>3</sup>TOFWERK AG, Schorenstrasse 39, 3645 Thun, Switzerland

# Formulae

## Parameters

Table S1. Symbols, explanation and formulae for parameters used to calculate  $\alpha$

| Symbol                    | Name                                                         | Formulae                                                      |
|---------------------------|--------------------------------------------------------------|---------------------------------------------------------------|
| $t$                       | Time                                                         |                                                               |
| $z$                       | Column depth                                                 |                                                               |
| $\theta$                  | Porosity                                                     |                                                               |
| $\theta_{\text{total}}$   | Total porosity                                               | $\frac{V_{\text{added water}}}{V_{\text{column}}}$            |
| $\theta_{\text{eff}}$     | Effective porosity                                           |                                                               |
| $\rho$                    | Bulk density                                                 |                                                               |
| $D$                       | Dispersivity                                                 |                                                               |
| $V_{\text{added water}}$  | Water added to column during packing                         |                                                               |
| $V_{\text{column water}}$ | Column volume                                                | $\frac{\pi L d_{\text{column}}^2}{4}$                         |
| $L$                       | Column length                                                |                                                               |
| $C$                       | Suspended ENM concentration                                  |                                                               |
| $C_0$                     | Added ENM concentration                                      |                                                               |
| $S$                       | ENM concentration attached to soil                           |                                                               |
| $Q$                       | Column flow rate                                             |                                                               |
| $U$                       | Approach velocity                                            | $\frac{4Q}{\pi d_{\text{column}}^2 \theta}$                   |
| $d_p$                     | ENM diameter                                                 |                                                               |
| $d_c$                     | Collector diameter (grain size)                              |                                                               |
| $d_{10}$                  | Diameter than which 10 % of soil volume has lower grain size |                                                               |
| $d_{50}$                  | Diameter than which 50 % of soil volume has lower grain size |                                                               |
| $A$                       | Hamaker constant                                             |                                                               |
| $k$                       | Boltzmann constant                                           |                                                               |
| $T$                       | Temperature                                                  |                                                               |
| $\mu$                     | Viscosity                                                    |                                                               |
| $\rho_p$                  | Density of the particle                                      |                                                               |
| $\rho_f$                  | Density of the fluid                                         |                                                               |
| $g$                       | Gravitational acceleration                                   |                                                               |
| $D_{\text{diff}}$         | Diffusion coefficient of the particle                        | $\frac{kT}{3\pi\mu d_p}$                                      |
| $\gamma$                  |                                                              | $\sqrt[3]{1 - \theta}$                                        |
| $A_s$                     |                                                              | $\frac{2(1 - \gamma^5)}{2 - 3\gamma + 3\gamma^5 - 2\gamma^6}$ |
| $N_R$                     | Aspect ratio                                                 | $\frac{d_p}{d_c}$                                             |
| $N_{Pe}$                  | Peclet number                                                | $\frac{U d_c}{D_{\text{diff}}}$                               |
| $N_{vdw}$                 | Van der Waals number                                         | $\frac{A}{kT}$                                                |
| $N_A$                     | Attraction number                                            | $\frac{A}{3\pi\mu d_p^2 U}$                                   |
| $N_G$                     | Gravity number                                               | $\frac{d_p^2 (\rho_p - \rho_f) g}{18\mu U}$                   |
| $N_{LO}$                  | London number                                                | $\frac{4}{3} N_A$                                             |

|          |  |                     |
|----------|--|---------------------|
| $N_{Gi}$ |  | $\frac{1}{N_G + 1}$ |
|----------|--|---------------------|

## Models

1. Tufenkji and Elimelech (2004)<sup>1</sup> (Abbreviation: “TE”)

$$\eta_0 = 2.4A_s^{1/3}N_R^{-0.081}N_{Pe}^{-0.715}N_{vdw}^{0.052} + 0.55A_sN_R^{1.676}N_A^{0.125} + 0.22N_R^{-0.24}N_G^{1.11}N_{vdw}^{0.053}$$

$$k = \frac{3(1-\theta)U}{2d_c\theta}\eta_0\alpha$$

2. Ma et al. (2009)<sup>2</sup> as corrected in <sup>3</sup> (Abbreviation: “MA2010”)

$$\eta_0 = \gamma^2 \left[ 2.3A_s^{1/3}N_R^{-0.028}N_{Pe}^{-0.66}N_A^{0.052} + 0.55A_sN_R^{1.8}N_A^{0.15} + 0.2N_R^{-0.047}N_G^{1.1}N_{Pe}^{0.053}N_A^{0.053} \right]$$

$$k = \frac{3(1-\theta)U}{2d_c\theta}\eta_0\alpha \left[ \frac{3-\theta}{3-3\theta} - \frac{2(3-\theta)}{\pi(3-3\theta)}\cos^{-1}\left(\frac{3-3\theta}{3-\theta}\right)^{1/2} + \frac{2}{\pi}\sqrt{2\left(\frac{3-\theta}{3-3\theta}\right)^{1/2}-1} \right] = \frac{3(1-\theta)U}{2d_c\theta}\eta_0\alpha f(\theta)$$

where  $f(\theta)$  a function of the porosity

3. Long and Hilpert <sup>4</sup> (Abbreviation: “LH”)

$$\eta_0 = 15.56\frac{(1-\theta)^3}{\theta^2}N_R^{0.19}N_{Pe}^{-0.65} + 0.55A_sN_R^{1.675}N_A^{0.125} + 0.22N_R^{-0.24}N_G^{1.11}N_{vdw}^{0.053}$$

$$k = \frac{3(1-\theta)U}{2d_c\theta}\eta_0\alpha$$

4. Nelson and Ginn<sup>5</sup>

$$\eta_0 = \gamma^2 \left[ 2.4A_s^{1/3} \left( \frac{N_{Pe}}{N_{Pe} + 16} \right) N_{Pe}^{-0.68} N_{Lo}^{0.015} N_{Gi}^{0.8} + A_s N_R^{15/8} N_{Lo}^{1/8} + 0.7N_R^{-0.05} N_G \frac{N_{Gi}}{N_{Gi} + 0.9} \right]$$

$$k = \frac{3(1-\theta)^{1/3}U}{2d_c\theta}\eta_0\alpha$$

Ma et al. (2013)<sup>6</sup> (Abbreviation: “MA2013”)

$$\eta_0 = \gamma^2 \left[ \frac{8 + 4(1-\gamma^{1/3})A_s^{1/3}N_{Pe}^{1/3}}{8 + (1-\gamma)N_{Pe}^{0.97}} N_{Lo}^{0.015} N_{Gi}^{0.8} N_R^{0.028} + A_s N_R^{15/8} N_{Lo}^{1/8} + 0.7N_R^{-0.05} N_G \frac{N_{Gi}}{N_{Gi} + 0.9} \right]$$

$$k = \frac{3(1-\theta)U}{2d_c\theta}\eta_0\alpha f(\theta)$$

Derivation of model 1 for Hemisphere-in-cell geometry (used in Ma et al. (2010)<sup>3</sup> and Ma et al. (2013)<sup>6</sup>)

By definition, the single-collector contact efficiency  $\eta$  is<sup>7</sup>

$$\eta = \frac{I}{AUC} \quad (\text{eq. S1})$$

With  $I$  the particle removal rate per collector,  $A$  the projected area of the collector including the fluid shell and  $C$  the local dispersed concentration of particles. In the case of a sphere-in-cell geometry,  $A = \pi d_c^2/4$  but for the hemisphere-in-cell geometry<sup>3</sup>

$$A = \frac{\pi d_c^2}{4} f(\theta) \quad (\text{eq. S2})$$

where  $f(\theta)$  was defined earlier. The macroscopic particle removal is obtained by multiplying the removal rate by one collector with the number of collectors per control volume  $N_c^3$ :

$$N_c = \frac{6(1-\theta)}{\pi d_c^3} A_c dz \quad (\text{eq. S3})$$

where  $A_c$  is the surface perpendicular to the flow direction and  $z$  is the flow direction. The overall particle removal in the control volume is given by combining eqs. S1 and S2 to obtain the removal by one collector and multiplying this with  $N_c$  (eq. S3):

$$I = \frac{3(1-\theta)\eta f(\theta)UC}{2d_c} A_c dz \quad (\text{eq. S4})$$

Considering  $I = -QdC$  with  $Q$  the volumetric flow, equal to  $UA_c$ , we can reorganise and integrate eq. S4 as

$$\int_{C_0}^{C_f} \frac{dC}{C} = - \frac{3(1-\theta)\eta f(\theta)}{2d_c} \int_0^L dz \quad (\text{eq. S5})$$

where  $C_0$  is the concentration at the column inlet,  $C_f$  is the particle concentration at the column outflow and  $L$  is the column length. Considering that  $\eta = \alpha\eta_0$ , Eq. S5 solves to

$$\alpha_{continuous} = - \frac{2d_c}{3(1-\theta)f(\theta)L\eta_0} \ln R \quad (\text{eq. S6})$$

with  $R$  the recovery.

## Soil properties

Table S2: Properties of the soils used in the experiments as well as the methods used to obtain these properties.

| Soil property                                           |      | Lufa 2.2 | Woburn | Dorsett | Chiltern | North Wales | Method                                        | Ref           |
|---------------------------------------------------------|------|----------|--------|---------|----------|-------------|-----------------------------------------------|---------------|
| pH                                                      |      | 6.49     | 6.41   | 4.08    | 7.63     | 4.77        | Water                                         | 8             |
| Texture (weight %)                                      | Sand | 67.25    | 75.56  | 91.8    | 29.5     | 57.7        | Stokes settling                               | 8             |
|                                                         | Silt | 17.51    | 11.81  | 4.7     | 46.8     | 29.7        |                                               |               |
|                                                         | Clay | 15.23    | 12.62  | 3.5     | 23.7     | 12.6        |                                               |               |
| Total organic carbon (weight %)                         |      | 1.53     | 0.61   | 2.18    | 3.26     | 9.63        | Leco Trumac CN analyser                       | 8             |
| Cation exchange capacity (cmol kg <sup>-1</sup> )       |      | 13.3     | 13.3   | 7.83    | 22.94    | 33.32       | Ammonium acetate extraction                   | 9             |
| ζ -potential (mV)                                       |      | -25.3    | -27.5  | -43.7   | -24      | -25.9       | Electrophoretic mobility (ζ <sub>n.d.</sub> ) | See main text |
|                                                         |      | -14.4    | -15.2  | -23.9   | -2.7     | -6.3        | Streaming potential (ζ <sub>dispersed</sub> ) |               |
| <i>d</i> <sub>10</sub> (μm)                             |      | 69.2     | 104.4  | 47.1    | 35.9     | NA*         | Dry-sieving                                   |               |
|                                                         |      | 45.0     | 26.3   | 47.2    | 8.7      | 43.7        | Mastersizer                                   |               |
| <i>d</i> <sub>50</sub> (μm)                             |      | 184.2    | 200.4  | 201.9   | 482.6    | 249.8       | Dry-sieving                                   |               |
|                                                         |      | 207.3    | 211.0  | 221.0   | 141.3    | 279.7       | Mastersizer                                   |               |
| Amorphous Fe, Al and Mn minerals (mg kg <sup>-1</sup> ) | Fe   | 1097.4   | 2706.9 | 208.2   | 1123.5   | 1588.9      | Oxalate extraction                            | 10            |
|                                                         | Al   | 415.8    | 379.6  | 145.5   | 1471.9   | 787.0       |                                               |               |
|                                                         | Mn   | 120.1    | 130.0  | 0.8     | 259.6    | 27.4        |                                               |               |
| Quartz (weight %)                                       |      | 78.8     | 88.2   | 91.8    | 10.8     | 72.3        | XRPD analysis                                 | 11            |
| K-feldspar (weight %)                                   |      | 9.1      | 0.4    | 0       | 0.3      | 1           |                                               |               |
| Plagioclase (weight %)                                  |      | 2.1      | 0.9    | 0.3     | 0.6      | 0.7         |                                               |               |
| Calcite (weight %)                                      |      | 0.5      | 0.1    | 0.1     | 75.7     | 0           |                                               |               |
| Aragonite (weight %)                                    |      | 0        | 0      | 0       | 1.6      | 0           |                                               |               |
| Goethite (weight %)                                     |      | 0.9      | 3.4    | 0.5     | 0.5      | 0.3         |                                               |               |
| Illite (weight %)                                       |      | 1.2      | 0.6    | 0.3     | 0.0      | 2.1         |                                               |               |
| Kaolinite (weight %)                                    |      | 0.5      | 0.4    | 0.2     | 0.0      | 0.5         |                                               |               |
| Chlorite (weight %)                                     |      | 0.1      | 0.0    | 0.0     | 0.0      | 0.0         |                                               |               |
| 2:1 clays (weight %)                                    |      | 2.8      | 3.6    | 0.4     | 6.2      | 2.2         |                                               |               |
| Amorphous (weight %)                                    |      | 4        | 2.4    | 6.4     | 4.3      | 20.8        |                                               |               |

\* Not available because a negative *d*<sub>10</sub> was calculated from the available dry sieving data

Some additional results on soil properties are shown below such as the boxplots of total and effective variance for each of the individual soils (Figure S1), a comparison of some soil properties (Figure S2), and a comparison of the grain size distribution obtained using laser scattering and dry sieving (Figure S3).

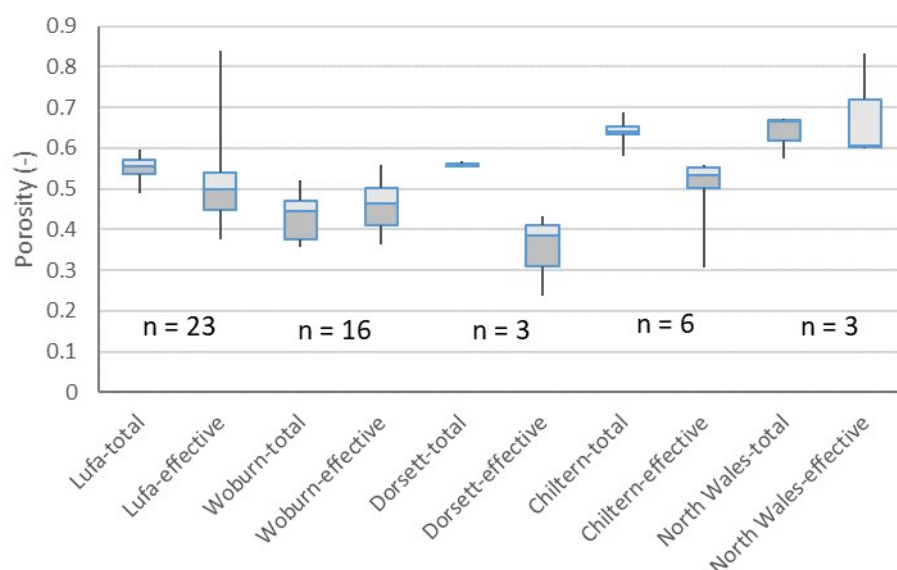

Figure S1. Boxplots of total and effective porosity for different soils showing also the number of data points for which these boxplots were calculated

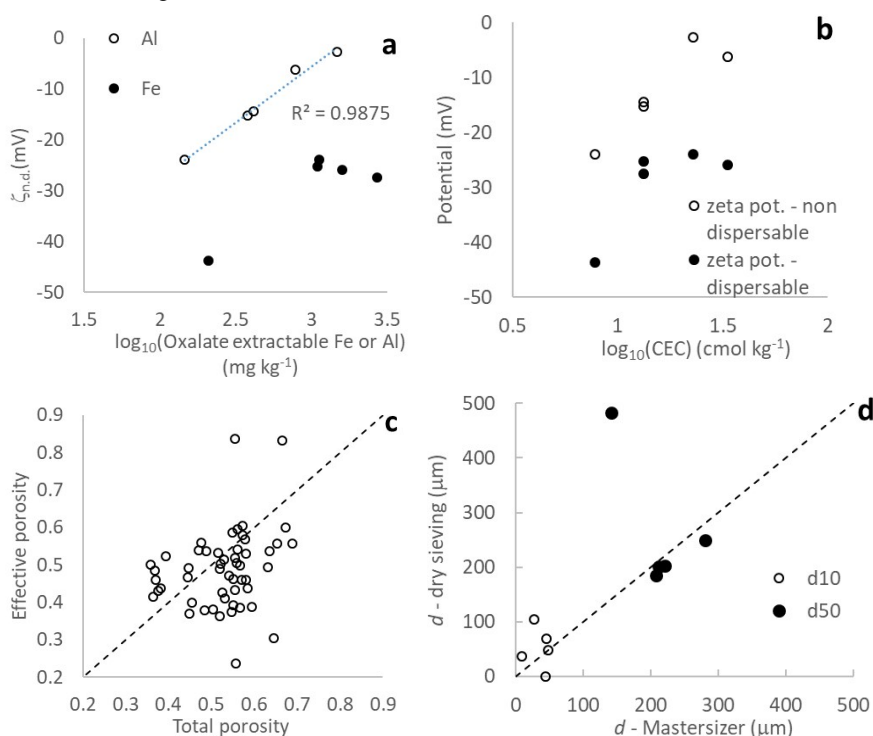

Figure S2. Interrelation of soil properties. a)  $\zeta$ -potential of the non-dispersable soil fraction versus oxalate extractable Al or Fe; b) CEC versus  $\zeta$ -potentials c) Effective versus total porosity showing also the 1:1 relation and d)  $d_{10}$  or  $d_{50}$  determined using light scattering versus using dry sieving also showing the 1:1 relation.

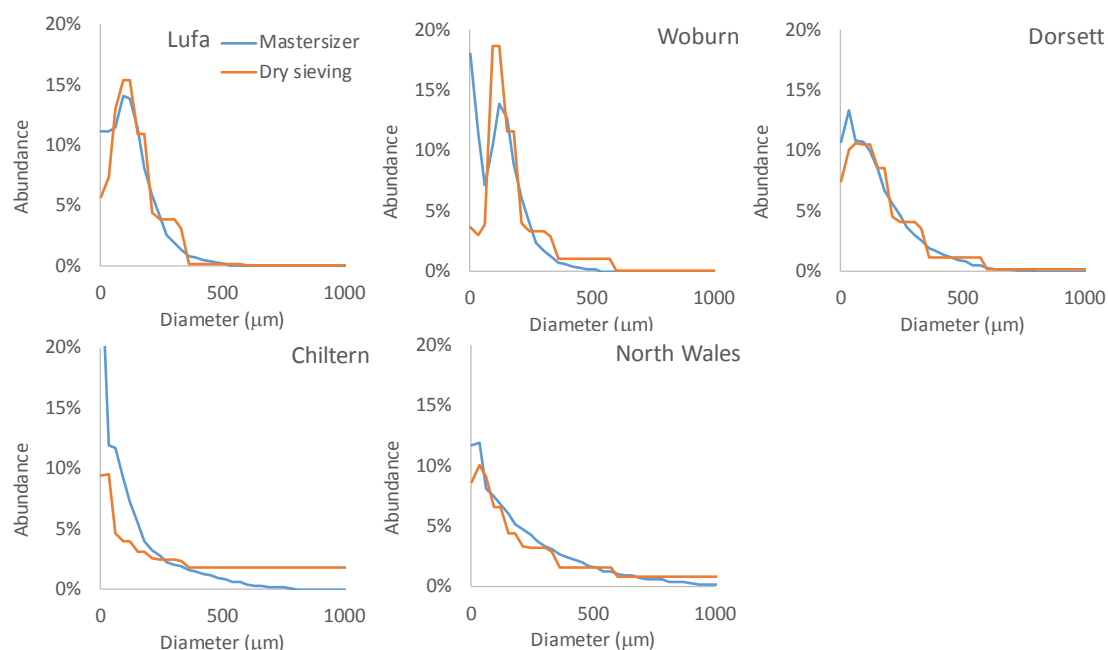

Figure S3. Grain size distributions determined using either mastersizer or dry sieving. Note that the distribution were rebinned to the same bin size of 50  $\mu\text{m}$ .

## spTOF-ICP-MS analysis

Table S3 shows the results of the spTOF-ICP-MS analysis that were done using 20 and 80 nm Au ENMs and saturated solutions of five soils. Shown are how much the saturated soil solution was diluted prior to mixing with diluted 20 nm or 80 nm Au suspensions and how many of the detected particle events of Al, Si, Ti, Mn and Fe, elements commonly found in mobile colloids, overlap with particle events of Au.

Table S3. Fraction of detected Au particle events that co-occur with particle events of common elements found in mobile colloids.

| Au ENM diameter | Dilution<br>Soil solution | Soil        | % of particle events overlapping with Au |    |    |    |    |     |
|-----------------|---------------------------|-------------|------------------------------------------|----|----|----|----|-----|
|                 |                           |             | Al                                       | Si | Ti | Mn | Fe | Sum |
| 20              | 100                       | Chiltern    | 0                                        | 0  | 0  | 0  | 0  | 0   |
| 20              | 100                       | Chiltern    | 0                                        | 0  | 0  | 0  | 0  | 0   |
| 20              | 100                       | Dorset      | 0                                        | 0  | 0  | 0  | 0  | 0   |
| 20              | 10                        | Lufa        | 0                                        | 0  | 0  | 20 | 40 | 60  |
| 20              | 100                       | Lufa        | 10                                       | 0  | 0  | 0  | 10 | 20  |
| 20              | 100                       | North Wales | 4                                        | 17 | 0  | 0  | 8  | 29  |
| 20              | 100                       | Woburn      | 0                                        | 0  | 0  | 0  | 13 | 13  |
| 20              | 100                       | Woburn      | 0                                        | 0  | 0  | 0  | 0  | 0   |
| 20              | 100                       | Woburn      | 0                                        | 0  | 0  | 0  | 0  | 0   |
| 20              | 1000                      | Woburn      | 0                                        | 0  | 0  | 0  | 29 | 29  |
| 80              | 100                       | Chiltern    | 0                                        | 0  | 0  | 0  | 0  | 0   |
| 80              | 100                       | Chiltern    | 2                                        | 8  | 0  | 0  | 0  | 10  |
| 80              | 200                       | Chiltern    | 3                                        | 7  | 1  | 0  | 2  | 13  |
| 80              | 10                        | North Wales | 0                                        | 1  | 0  | 0  | 2  | 3   |
| 80              | 100                       | North Wales | 0                                        | 1  | 0  | 0  | 1  | 2   |
| 80              | 100                       | North Wales | 0                                        | 4  | 1  | 0  | 1  | 6   |
| 80              | 10                        | Woburn      | 1                                        | 4  | 0  | 0  | 3  | 7   |
| 80              | 10                        | Woburn      | 0                                        | 4  | 0  | 0  | 8  | 13  |
| 80              | 10                        | Woburn      | 1                                        | 1  | 0  | 0  | 4  | 5   |
| 80              | 10                        | Woburn      | 1                                        | 1  | 0  | 0  | 5  | 7   |
| 80              | 100                       | Woburn      | 1                                        | 3  | 0  | 0  | 5  | 9   |
| 80              | 100                       | Woburn      | 1                                        | 1  | 0  | 0  | 4  | 6   |

Figure S4 shows how the observed % of coincidences of Au with other elements (last column in Table S3) as a function of predicted fraction of coincidences in case of random arrival that was calculated as the joint (empirical) probability of a particle event occurring together with a Au particle event, summed over all elements other than Au. Most predicted probabilities are higher than the observed fractions, suggesting that very few detected coincidences are in fact heteroaggregates.

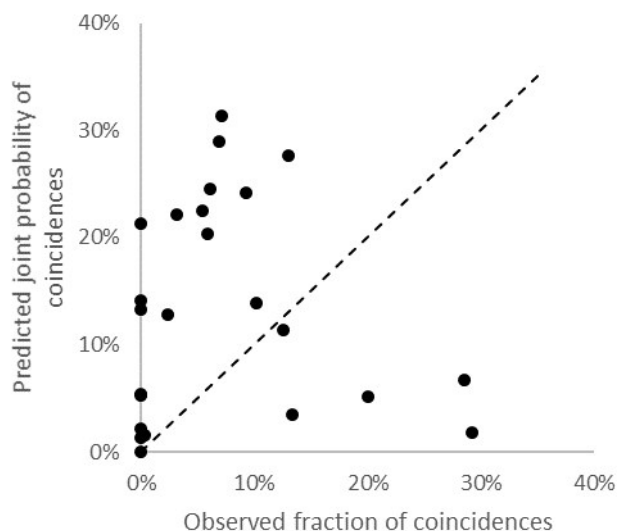

Figure S4. Total predicted probability of random coincidences of Au particle events as a function of observed fraction of total coincidences. The 1:1 relation is indicated as well.

## Examples of BTC and associated fits

All figure below show experimental breakthrough curves (BTCs) and fitted models of inert tracer conductivity data on the left and ENM BTCs and fitted models on the right. All conductivity and concentration data is normalised (divided by input conductivity or ENM concentration). Elution time was recalculated into number of eluted pore volumes that were calculated using the effective porosity as deducted from inter tracer model fitting. The fitted model in the case of the inert tracer is a zero interaction model, whereas the three models that were fitted to ENM BTCs using Hydrus 1D are shown, i.e. a model assuming irreversible attachment only (“Attach”), a model assuming only straining (“Straining”) and a model assuming that types of attachment sites exist where either irreversible or reversible sorption occurs (“2-sites”).

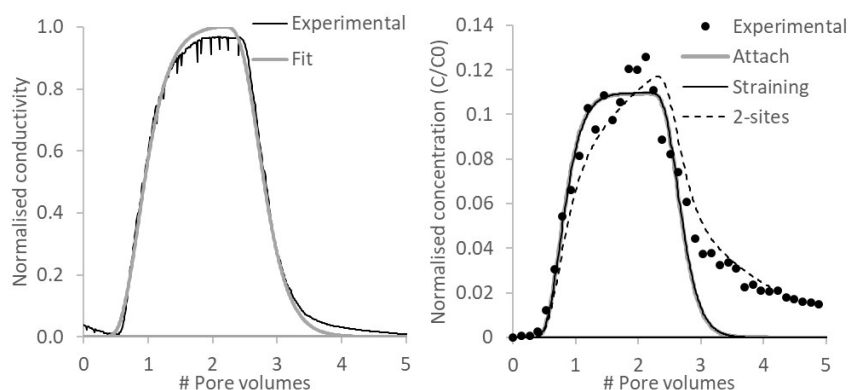

Figure S5. 23.22 mg kg<sup>-1</sup> 20 nm Au ENMs eluting from a Lufa 2.2 soil column.



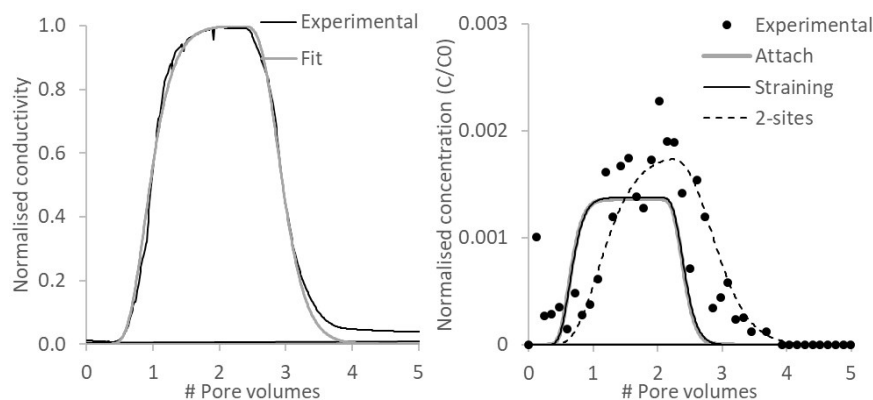

Figure S6. 33.95 mg kg<sup>-1</sup> 20 nm Au ENMs eluting from a Woburn soil column.

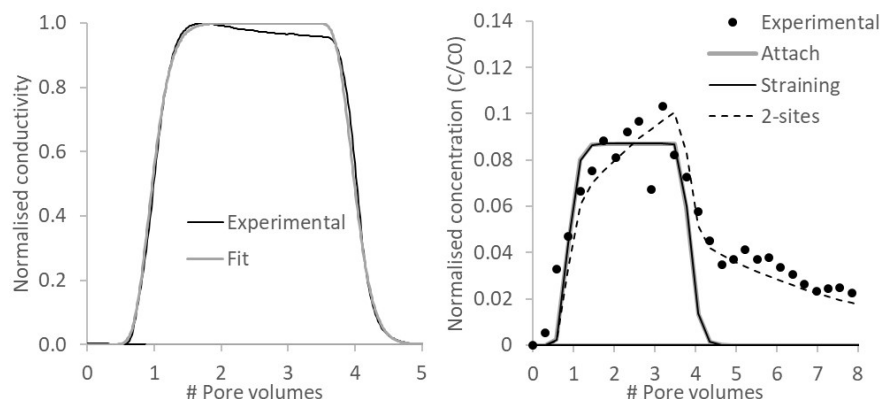

Figure S7. 2.65 mg kg<sup>-1</sup> 80 nm Au ENMs eluting from a Dorsett soil column.

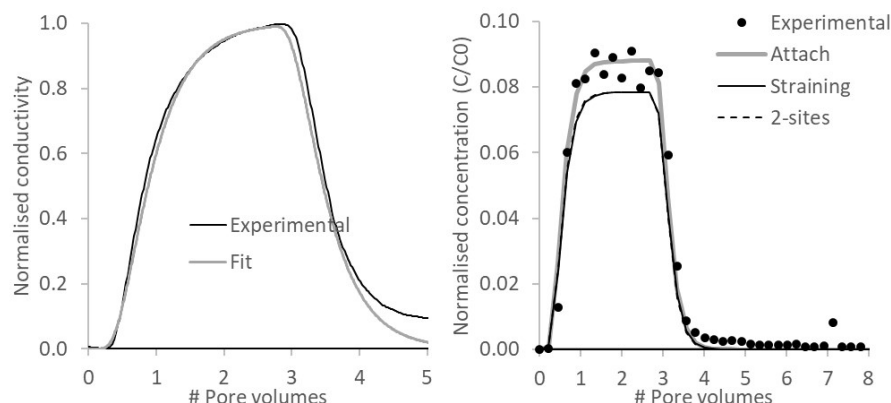

Figure S8. 1.66 mg kg<sup>-1</sup> Ag<sub>2</sub>S ENMs eluting from Chiltern soil columns. The 2 sites model overlaps with the straining model.

## PLS1 Analysis

PLS is a more appropriate regression analysis than multiple linear regression in cases such as in the current study where many, often intercorrelating, predictor variables exist versus a relatively low (here  $n = 52$ ) number of observations. The PLS approach is termed PLS1 because, in this case, there is only a single response variable  $y$ . In PLS1, the  $X (n \times p)$  matrix of predictor values and a response vector  $y (n \times 1)$  are expressed in terms of a number ( $I$ ) of latent variables, sometimes also called principal components in analogy with PCA, according to the following equations:

$$X = TP^t + E \quad \text{Equation S1}$$

$$y = Tb + f \quad \text{Equation S2}$$

Note that matrices are denoted using capital letters, whereas vectors are denoted using lower-case letters. In the equation above, the  $pxl$  matrix  $\mathbf{P}$  describes the latent  $X$ -variables, called **loadings**, the **scores** are contained in the  $nxl$  matrix  $\mathbf{T}$  and  $E$  ( $n \times p$ ) represents random errors. The  $y$  vector is related to the loadings via the regression coefficient vector  $b$  ( $1 \times l$ ) with some residual  $f$ . It is the purpose of PLS, given a number of latent variables  $l$ , to find the weights  $W$  ( $pxl$ ) for which the scores  $T = XW$  so that for each latent variable  $t_a$ , i.e. each column  $a$  of  $T$  and row  $a$  of  $P$ , the covariance between  $y$  and  $t_a$  is maximal. An estimated  $X_{est} = t_a p_a'$  is then subtracted from  $E$  producing a new variable  $X_{a+1}$  for which the procedure is repeated producing a new latent variable (and thus a new column, reps. Row for  $T$  and  $P$ ). This procedure is repeated until the set value of  $l$  is reached or  $E$  equals the zero matrix.

Prior to PCA and PLS, all predictor and response variables were logarithmically (base 10) transformed if skewness was larger than 1 (Table S4). If skewness was larger than 0.5, transformation was only done if this operation reduced skewness. The untransformed variable was also used when logarithmic or any other (arcsin, square root) transformation did not result in any improvement in skewness. Transformed variables were subsequently centered and rescaled producing  $z$ -scores.

*Table S4. Independent variables and how these were transformed prior to PLSI analysis.*

| Independent Variables  | Transformation    | Skewness of transformed variable |
|------------------------|-------------------|----------------------------------|
| Column length          | None              | 0.35                             |
| Approach velocity      | Log <sub>10</sub> | -0.07                            |
| Effective porosity     | Log <sub>10</sub> | -0.30                            |
| Total porosity         | None              | -0.47                            |
| Dispersivity           | Log <sub>10</sub> | 0.78                             |
| ENP size               | None              | 0.38                             |
| ENP concentration      | Log <sub>10</sub> | 0.20                             |
| pH*                    | None              | 1.38                             |
| Sand content*          | None              | -1.14                            |
| Clay content           | None              | 0.10                             |
| $d_{10}$ (Mastersizer) | None              | -0.23                            |
| $d_{50}$ (Mastersizer) | None              | -0.24                            |
| Total carbon           | Log <sub>10</sub> | 0.76                             |
| $\zeta_{dispersed}$ *  | None              | -3.40                            |
| $\zeta_{n.d.}$         | None              | 0.78                             |
| Oxalate extractable Fe | None              | 0.47                             |
| Oxalate extractable Al | Log <sub>10</sub> | 0.78                             |

\* No transformation resulted in reduced skewness

The optimal number of latent variables  $l$  was found in this study by removing one observation from the data set and then predicting the response for this variable based on a PLS analysis with  $l$  latent variables of the remaining experiments. Predicted variables for all experiments can thus be obtained and a mean squared error of prediction (MSEP) with observed variables can thus be obtained as a function of  $l$ . The optimal  $l$  was thus the number where the highest MSEP was found.

$p$  (the number of predictor variables) was also optimized because a high number tends to spoil PLS analyses reducing their consistency and introducing unnecessary variance. In a first step, intercorrelating variables were divided in groups based on their PCA scores and if a physical explanation could be found for the observed covariance. One predictor variable representative for each group was retained. A PLS analysis was subsequently run with the remaining predictors and the variable importance in projection (VIP) of each variable was then calculated according to equation S3.

$$VIP_j = \sqrt{\frac{p \sum_{k=1}^l \left[ SS_k \left( \frac{w_{jk}}{\|w_k\|} \right)^2 \right]}{\sum_{k=1}^l SS_k}} \quad \text{Equation S3}$$

Here,  $p$  is the number of predictor variables,  $l$  is the number of latent variables,  $SS$  is the sum of squares relative to the  $k^{\text{th}}$  latent variable calculated as  $b_k^2 t_k^2$  where  $b_k$  and  $t_k$  are the predictor scores and response loadings, respectively.  $w_{jk}$  is the weight of the  $j^{\text{th}}$  predictor variable,  $\|w_k\|$  is the Euclidian norm of the weight vector of the  $k^{\text{th}}$  latent variable. Variables having  $VIP < 1$  were removed and PLS1 was repeated, including optimizing the number of latent variables, with the  $z$ -scores of selected variables.

Table S5 summarizes the results of the PLS1 analysis, showing the % variance explained by each latent variable that was retained after cross validation and selection of predictor variables.

Table S5 summary of the PLSI results including for each model, the number of retained data points, the optimal number of components (latent variables), the total % of the variance explained and the weights different variables have on the first latent variable.

| Porosity  | Diameter   | Correlation | Model      | n  | Total variance explained  | # components | Weights on first comp by NM and soil props |       |        |      |        |                |                     |            | Weights on first comp by operational parameters |               |       |       |          |              |                   |
|-----------|------------|-------------|------------|----|---------------------------|--------------|--------------------------------------------|-------|--------|------|--------|----------------|---------------------|------------|-------------------------------------------------|---------------|-------|-------|----------|--------------|-------------------|
|           |            |             |            |    |                           |              | NM size                                    | pH    | Sand   | Clay | TOC    | Zeta Potential | Streaming Potential | Oxalate Fe | Oxalate Al                                      | Column length | C0    | dc    | $\theta$ | Dispersivity | Approach velocity |
| Effective | Single d10 | TE          | Continuous | 34 | <div><div>26%</div></div> | 1            | 0.059                                      | 0     | 0      | 0    | 0      | 0              | 0                   | 0          | 0                                               | 0             | 0.080 | 0.081 | 0        | 0            | 0.057             |
|           |            |             | Pulse      | 34 | <div><div>27%</div></div> | 1            | 0.059                                      | 0     | 0      | 0    | 0      | 0              | 0                   | 0          | 0                                               | 0             | 0.081 | 0.079 | 0        | 0            | 0.058             |
|           |            |             | Attachment | 47 | <div><div>42%</div></div> | 2            | 0                                          | 0.029 | 0      | 0    | -0.036 | 0.030          | 0                   | 0          | 0                                               | 0.045         | 0.045 | 0.033 | 0        | 0            | 0.034             |
|           |            |             | Straining  | 47 | <div><div>36%</div></div> | 1            | 0                                          | 0.033 | 0      | 0    | -0.043 | 0.028          | 0                   | 0          | 0                                               | 0.052         | 0.043 | 0     | 0        | 0            | 0.034             |
|           |            |             | 2-sites    | 44 | <div><div>8%</div></div>  | 1            | 0                                          | 0     | 0      | 0    | 0.054  | 0              | 0                   | -0.044     | 0                                               | 0             | 0.048 | 0.058 | 0.052    | 0            | 0                 |
|           |            | LH          | Continuous | 34 | <div><div>28%</div></div> | 3            | 0                                          | 0     | 0      | 0    | 0      | 0              | 0                   | 0          | 0                                               | 0             | 0.078 | 0.080 | 0.050    | 0            | 0.060             |
|           |            |             | Pulse      | 34 | <div><div>39%</div></div> | 4            | 0                                          | 0     | 0      | 0    | 0      | 0              | 0                   | 0          | 0                                               | 0             | 0.079 | 0.078 | 0.050    | 0            | 0.061             |
|           |            |             | Attachment | 47 | <div><div>49%</div></div> | 2            | 0                                          | 0     | 0      | 0    | 0      | 0.040          | 0                   | 0          | 0                                               | 0.039         | 0.045 | 0.041 | 0.051    | 0            | 0.037             |
|           |            |             | Straining  | 47 | <div><div>33%</div></div> | 2            | 0                                          | 0.030 | 0      | 0    | -0.032 | 0.035          | 0                   | 0          | 0                                               | 0.045         | 0.041 | 0     | 0.039    | 0            | 0.035             |
|           |            |             | 2-sites    | 44 | <div><div>11%</div></div> | 1            | 0                                          | 0     | 0      | 0    | 0.054  | 0              | 0                   | -0.041     | 0                                               | 0             | 0.039 | 0.055 | 0.067    | 0            | 0                 |
|           |            | MA2010      | Continuous | 34 | <div><div>26%</div></div> | 1            | 0.058                                      | 0     | 0      | 0    | 0      | 0              | 0                   | 0          | 0                                               | 0             | 0.080 | 0.081 | 0        | 0            | 0.058             |
|           |            |             | Pulse      | 34 | <div><div>27%</div></div> | 1            | 0.058                                      | 0     | 0      | 0    | 0      | 0              | 0                   | 0          | 0                                               | 0             | 0.081 | 0.079 | 0        | 0            | 0.059             |
|           |            |             | Attachment | 47 | <div><div>42%</div></div> | 2            | 0                                          | 0.029 | 0      | 0    | -0.035 | 0.031          | 0                   | 0          | 0                                               | 0.045         | 0.045 | 0.034 | 0        | 0            | 0.035             |
|           |            |             | Straining  | 47 | <div><div>37%</div></div> | 2            | 0                                          | 0.033 | 0      | 0    | -0.042 | 0.029          | 0                   | 0          | 0                                               | 0.052         | 0.043 | 0     | 0        | 0            | 0.034             |
|           |            |             | 2-sites    | 44 | <div><div>8%</div></div>  | 1            | 0                                          | 0     | 0      | 0    | 0.054  | 0              | 0                   | -0.043     | 0                                               | 0             | 0.048 | 0.058 | 0.053    | 0            | 0                 |
|           |            | NG          | Continuous | 34 | <div><div>24%</div></div> | 1            | 0.054                                      | 0     | 0      | 0    | 0      | 0              | 0                   | 0          | 0                                               | 0             | 0.082 | 0.081 | 0        | 0            | 0.059             |
|           |            |             | Pulse      | 34 | <div><div>25%</div></div> | 1            | 0.054                                      | 0     | 0      | 0    | 0      | 0              | 0                   | 0          | 0                                               | 0             | 0.083 | 0.079 | 0        | 0            | 0.060             |
|           |            |             | Attachment | 47 | <div><div>43%</div></div> | 2            | 0                                          | 0.031 | 0      | 0    | -0.036 | 0.031          | 0                   | 0          | 0                                               | 0.045         | 0.045 | 0.031 | 0        | 0            | 0.034             |
|           |            |             | Straining  | 47 | <div><div>38%</div></div> | 2            | 0                                          | 0.031 | 0      | 0    | -0.038 | 0.026          | 0                   | 0.025      | 0                                               | 0.047         | 0.038 | 0     | 0        | 0            | 0.030             |
|           |            |             | 2-sites    | 44 | <div><div>8%</div></div>  | 1            | 0                                          | 0     | 0      | 0    | 0.056  | 0              | 0                   | -0.043     | 0                                               | 0             | 0.049 | 0.056 | 0.054    | 0            | 0                 |
|           |            | MA2013      | Continuous | 34 | <div><div>20%</div></div> | 1            | 0.052                                      | 0     | 0      | 0    | 0      | 0              | 0                   | 0          | 0                                               | 0             | 0.083 | 0.081 | 0        | 0            | 0.060             |
|           |            |             | Pulse      | 34 | <div><div>22%</div></div> | 1            | 0.052                                      | 0     | 0      | 0    | 0      | 0              | 0                   | 0          | 0                                               | 0             | 0.084 | 0.078 | 0        | 0            | 0.061             |
|           |            |             | Attachment | 47 | <div><div>43%</div></div> | 2            | 0                                          | 0.033 | 0      | 0    | -0.036 | 0.032          | 0                   | 0          | 0                                               | 0.046         | 0.045 | 0.029 | 0        | 0            | 0.034             |
|           |            |             | Straining  | 47 | <div><div>38%</div></div> | 2            | 0                                          | 0.032 | 0      | 0    | -0.038 | 0.026          | 0                   | 0.026      | 0                                               | 0.047         | 0.038 | 0     | 0        | 0            | 0.029             |
|           |            |             | 2-sites    | 44 | <div><div>8%</div></div>  | 1            | 0                                          | 0     | 0      | 0    | 0.057  | 0              | 0                   | -0.043     | 0                                               | 0             | 0.050 | 0.054 | 0.055    | 0            | 0                 |
|           | Single d50 | TE          | Continuous | 34 | <div><div>26%</div></div> | 1            | 0.050                                      | 0     | 0      | 0    | 0      | 0              | 0                   | 0          | 0                                               | 0.068         | 0.069 | 0     | 0        | 0.042        | 0.062             |
|           |            |             | Pulse      | 34 | <div><div>27%</div></div> | 1            | 0.047                                      | 0     | 0      | 0    | 0      | 0              | 0                   | 0          | 0                                               | 0.068         | 0.066 | 0     | 0        | 0.050        | 0.061             |
|           |            |             | Attachment | 47 | <div><div>42%</div></div> | 2            | 0                                          | 0.030 | 0      | 0    | -0.035 | 0              | 0                   | 0.049      | 0                                               | 0.050         | 0     | 0     | 0        | 0.046        | 0                 |
|           |            |             | Straining  | 47 | <div><div>36%</div></div> | 1            | 0                                          | 0.030 | 0      | 0    | -0.038 | 0              | 0                   | 0.049      | 0                                               | 0.050         | 0     | 0     | 0        | 0.042        | 0                 |
|           |            |             | 2-sites    | 44 | <div><div>8%</div></div>  | 1            | 0                                          | 0     | -0.030 | 0    | 0.041  | 0              | 0.043               | 0          | 0.038                                           | 0             | 0     | 0     | 0.035    | 0.030        | 0                 |
|           |            | LH          | Continuous | 34 | <div><div>34%</div></div> | 3            | 0                                          | 0     | 0      | 0    | 0      | 0              | 0                   | 0.036      | 0                                               | 0.047         | 0.058 | 0     | 0.068    | 0            | 0.060             |
|           |            |             | Pulse      | 34 | <div><div>39%</div></div> | 4            | 0                                          | 0     | 0      | 0    | 0      | 0              | 0                   | 0.038      | 0                                               | 0.048         | 0.057 | 0     | 0.066    | 0            | 0.059             |
|           |            |             | Attachment | 47 | <div><div>49%</div></div> | 2            | -0.039                                     | 0     | 0      | 0    | 0      | 0              | 0                   | 0.058      | 0                                               | 0.055         | 0     | 0     | 0.044    | 0.053        | 0                 |
|           |            |             | Straining  | 47 | <div><div>34%</div></div> | 2            | -0.035                                     | 0     | 0      | 0    | -0.033 | 0              | 0                   | 0.052      | 0                                               | 0.050         | 0     | 0     | 0        | 0.043        | 0                 |
|           |            |             | 2-sites    | 44 | <div><div>12%</div></div> | 1            | 0                                          | 0     | -0.029 | 0    | 0.045  | 0              | 0.042               | 0          | 0.037                                           | 0             | 0     | 0     | 0.055    | 0            | 0                 |
|           |            | MA2010      | Continuous | 34 | <div><div>26%</div></div> | 1            | 0.049                                      | 0     | 0      | 0    | 0      | 0              | 0                   | 0          | 0                                               | 0.067         | 0.069 | 0     | 0        | 0.041        | 0.063             |
|           |            |             | Pulse      | 34 | <div><div>27%</div></div> | 1            | 0.047                                      | 0     | 0      | 0    | 0      | 0              | 0                   | 0          | 0                                               | 0.068         | 0.067 | 0     | 0        | 0.049        | 0.061             |
|           |            |             | Attachment | 47 | <div><div>42%</div></div> | 2            | 0                                          | 0.030 | 0      | 0    | -0.035 | 0              | 0                   | 0.049      | 0                                               | 0.050         | 0     | 0     | 0        | 0.046        | 0                 |
|           |            |             | Straining  | 47 | <div><div>37%</div></div> | 2            | 0                                          | 0.030 | 0      | 0    | -0.038 | 0              | 0                   | 0.050      | 0                                               | 0.050         | 0     | 0     | 0        | 0.042        | 0                 |
|           |            |             | 2-sites    | 44 | <div><div>8%</div></div>  | 1            | 0                                          | 0     | -0.030 | 0    | 0.041  | 0              | 0.042               | 0          | 0.038                                           | 0             | 0     | 0     | 0.036    | 0.030        | 0                 |
|           |            | NG          | Continuous | 34 | <div><div>25%</div></div> | 1            | 0.041                                      | 0     | 0      | 0    | 0      | 0              | 0                   | 0.035      | 0                                               | 0.063         | 0.063 | 0     | 0        | 0.040        | 0.056             |
|           |            |             | Pulse      | 34 | <div><div>26%</div></div> | 1            | 0.038                                      | 0     | 0      | 0    | 0      | 0              | 0                   | 0.036      | 0                                               | 0.063         | 0.060 | 0     | 0        | 0.047        | 0.054             |
|           |            |             | Attachment | 47 | <div><div>43%</div></div> | 2            | 0                                          | 0.029 | 0      | 0    | -0.035 | 0              | 0                   | 0.049      | 0                                               | 0.050         | 0     | 0     | 0        | 0.046        | 0                 |
|           |            |             | Straining  | 47 | <div><div>38%</div></div> | 2            | 0                                          | 0.029 | 0      | 0    | -0.038 | 0              | 0                   | 0.050      | 0                                               | 0.050         | 0     | 0     | 0        | 0.042        | 0                 |
|           |            |             | 2-sites    | 44 | <div><div>8%</div></div>  | 1            | 0                                          | 0     | -0.030 | 0    | 0.041  | 0              | 0.042               | 0          | 0.038                                           | 0             | 0     | 0     | 0.036    | 0.030        | 0                 |
|           |            | MA2013      | Continuous | 34 | <div><div>24%</div></div> | 1            | 0.039                                      | 0     | 0      | 0    | 0      | 0              | 0                   | 0.036      | 0                                               | 0.062         | 0.063 | 0     | 0        | 0.039        | 0.057             |
|           |            |             | Pulse      | 34 | <div><div>25%</div></div> | 1            | 0.036                                      | 0     | 0      | 0    | 0      | 0              | 0                   | 0.037      | 0                                               | 0.062         | 0.061 | 0     | 0        | 0.046        | 0.055             |
|           |            |             | Attachment | 47 | <div><div>43%</div></div> | 2            | 0                                          | 0.029 | 0      | 0    | -0.035 | 0              | 0                   | 0.050      | 0                                               | 0.050         | 0     | 0     | 0        | 0.046        | 0                 |
|           |            |             | Straining  | 47 | <div><div>37%</div></div> | 2            | 0                                          | 0.030 | 0      | 0    | -0.038 | 0              | 0                   | 0.050      | 0                                               | 0.050         | 0     | 0     | 0        | 0.042        | 0                 |
|           |            |             | 2-sites    | 44 | <div><div>8%</div></div>  | 1            | 0                                          | 0     | -0.030 | 0    | 0.041  | 0              | 0.042               | 0          | 0.038                                           | 0             | 0     | 0     | 0.037    | 0.030        | 0                 |

| Porosity  | Diameter    | Correlation | Model      | n  | Total variance explained  | # components | Weights on first comp by NM and soil props |       |        |      |        |                |                     |            | Weights on first comp by operational parameters |               |       |        |          |              |                   |
|-----------|-------------|-------------|------------|----|---------------------------|--------------|--------------------------------------------|-------|--------|------|--------|----------------|---------------------|------------|-------------------------------------------------|---------------|-------|--------|----------|--------------|-------------------|
|           |             |             |            |    |                           |              | NM size                                    | pH    | Sand   | Clay | TOC    | Zeta Potential | Streaming Potential | Oxalate Fe | Oxalate Al                                      | Column length | C0    | dc     | $\theta$ | Dispersivity | Approach velocity |
| Effective | Distributed | TE          | Continuous | 34 | <div><div>26%</div></div> | 1            | 0.048                                      | 0     | 0      | 0    | 0      | 0              | 0                   | 0          | 0                                               | 0.065         | 0.069 | -0.047 | 0        | 0.064        | 0.070             |
|           |             |             | Pulse      | 34 | <div><div>27%</div></div> | 1            | 0.045                                      | 0     | 0      | 0    | 0      | 0              | 0                   | 0          | 0                                               | 0.064         | 0.066 | -0.050 | 0        | 0.071        | 0.067             |
|           |             |             | Attachment | 47 | <div><div>43%</div></div> | 2            | 0                                          | 0     | 0      | 0    | 0      | 0              | 0                   | 0.053      | 0                                               | 0.048         | 0     | -0.052 | 0        | 0.054        | 0                 |
|           |             |             | Straining  | 47 | <div><div>36%</div></div> | 1            | 0                                          | 0     | 0      | 0    | 0      | 0              | 0                   | 0.056      | 0                                               | 0.050         | 0     | -0.050 | 0        | 0.048        | 0                 |
|           |             |             | 2-sites    | 44 | <div><div>8%</div></div>  | 1            | 0                                          | 0     | -0.034 | 0    | 0      | 0              | 0.034               | 0          | 0.035                                           | 0.048         | 0.037 | 0      | 0        | 0.060        | 0.042             |
|           |             | LH          | Continuous | 34 | <div><div>34%</div></div> | 2            | 0                                          | 0     | 0      | 0    | 0      | 0.008          | 0                   | 0          | 0                                               | 0.058         | 0.066 | -0.042 | 0        | 0.062        | 0.081             |
|           |             |             | Pulse      | 34 | <div><div>39%</div></div> | 4            | 0                                          | 0     | 0      | 0    | 0      | 0.009          | 0                   | 0          | 0                                               | 0.057         | 0.063 | -0.044 | 0        | 0.067        | 0.077             |
|           |             |             | Attachment | 47 | <div><div>48%</div></div> | 2            | 0                                          | 0     | 0      | 0    | 0      | 0              | 0                   | 0.052      | 0                                               | 0.048         | 0     | -0.047 | 0.043    | 0.057        | 0                 |
|           |             |             | Straining  | 47 | <div><div>37%</div></div> | 2            | -0.034                                     | 0     | 0      | 0    | 0      | 0              | 0                   | 0.051      | 0                                               | 0.046         | 0     | -0.043 | 0        | 0.046        | 0                 |
|           |             |             | 2-sites    | 44 | <div><div>11%</div></div> | 1            | 0                                          | 0     | -0.035 | 0    | 0      | 0              | 0.034               | 0          | 0.035                                           | 0.046         | 0.037 | 0      | 0        | 0.059        | 0.045             |
|           |             | MA2010      | Continuous | 34 | <div><div>26%</div></div> | 1            | 0.048                                      | 0     | 0      | 0    | 0      | 0              | 0                   | 0          | 0                                               | 0.064         | 0.069 | -0.046 | 0        | 0.064        | 0.071             |
|           |             |             | Pulse      | 34 | <div><div>27%</div></div> | 1            | 0.045                                      | 0     | 0      | 0    | 0      | 0              | 0                   | 0          | 0                                               | 0.064         | 0.066 | -0.049 | 0        | 0.070        | 0.068             |
|           |             |             | Attachment | 47 | <div><div>42%</div></div> | 2            | 0                                          | 0     | 0      | 0    | 0      | 0              | 0                   | 0.053      | 0                                               | 0.048         | 0     | -0.051 | 0        | 0.051        | 0                 |
|           |             |             | Straining  | 47 | <div><div>37%</div></div> | 2            | 0                                          | 0     | 0      | 0    | 0      | 0              | 0                   | 0.056      | 0                                               | 0.050         | 0     | -0.050 | 0        | 0.048        | 0                 |
|           |             |             | 2-sites    | 44 | <div><div>8%</div></div>  | 1            | 0                                          | 0     | -0.035 | 0    | 0      | 0              | 0.034               | 0          | 0.035                                           | 0.048         | 0.037 | 0      | 0        | 0.060        | 0.042             |
|           |             | NG          | Continuous | 34 | <div><div>25%</div></div> | 1            | 0.043                                      | 0     | 0      | 0    | 0      | 0              | 0                   | 0          | 0                                               | 0.065         | 0.068 | -0.049 | 0        | 0.066        | 0.069             |
|           |             |             | Pulse      | 34 | <div><div>27%</div></div> | 1            | 0.040                                      | 0     | 0      | 0    | 0      | 0              | 0                   | 0          | 0                                               | 0.064         | 0.065 | -0.052 | 0        | 0.073        | 0.066             |
|           |             |             | Attachment | 47 | <div><div>43%</div></div> | 2            | 0                                          | 0     | 0      | 0    | 0      | 0              | 0                   | 0.053      | 0                                               | 0.048         | 0     | -0.052 | 0        | 0.051        | 0                 |
|           |             |             | Straining  | 47 | <div><div>38%</div></div> | 2            | 0                                          | 0     | 0      | 0    | 0      | 0              | 0                   | 0.056      | 0                                               | 0.050         | 0     | -0.051 | 0        | 0.048        | 0                 |
|           |             |             | 2-sites    | 44 | <div><div>8%</div></div>  | 1            | 0                                          | 0     | -0.034 | 0    | 0      | 0              | 0.034               | 0          | 0.035                                           | 0.048         | 0.037 | 0      | 0        | 0.060        | 0.042             |
|           |             | MA2013      | Continuous | 34 | <div><div>24%</div></div> | 1            | 0.041                                      | 0     | 0      | 0    | 0      | 0              | 0                   | 0          | 0                                               | 0.064         | 0.069 | -0.048 | 0        | 0.066        | 0.070             |
|           |             |             | Pulse      | 34 | <div><div>25%</div></div> | 1            | 0.039                                      | 0     | 0      | 0    | 0      | 0              | 0                   | 0          | 0                                               | 0.064         | 0.065 | -0.051 | 0        | 0.072        | 0.067             |
|           |             |             | Attachment | 47 | <div><div>43%</div></div> | 2            | 0                                          | 0     | 0      | 0    | 0      | 0              | 0                   | 0.053      | 0                                               | 0.048         | 0     | -0.052 | 0        | 0.054        | 0                 |
|           |             |             | Straining  | 47 | <div><div>37%</div></div> | 2            | 0                                          | 0     | 0      | 0    | 0      | 0              | 0                   | 0.056      | 0                                               | 0.050         | 0     | -0.050 | 0        | 0.048        | 0                 |
|           |             |             | 2-sites    | 44 | <div><div>8%</div></div>  | 1            | 0                                          | 0     | -0.034 | 0    | 0      | 0              | 0.034               | 0          | 0.035                                           | 0.048         | 0.037 | 0      | 0        | 0.060        | 0.042             |
| Total     | Single d10  | TE          | Continuous | 34 | <div><div>33%</div></div> | 2            | 0.055                                      | 0     | 0      | 0    | 0      | 0              | 0                   | -0.041     | 0                                               | 0             | 0.070 | 0.076  | 0        | 0            | 0.050             |
|           |             |             | Pulse      | 34 | <div><div>35%</div></div> | 2            | 0.055                                      | 0     | 0      | 0    | 0      | 0              | 0                   | -0.040     | 0                                               | 0             | 0.071 | 0.074  | 0        | 0            | 0.052             |
|           |             |             | Attachment | 47 | <div><div>44%</div></div> | 2            | 0                                          | 0.036 | 0      | 0    | -0.039 | 0              | 0                   | 0          | 0                                               | 0.047         | 0.051 | 0.041  | 0        | 0            | 0.036             |
|           |             |             | Straining  | 47 | <div><div>36%</div></div> | 1            | 0                                          | 0.034 | 0      | 0    | -0.040 | 0              | 0                   | 0          | 0                                               | 0.047         | 0.040 | 0      | -0.032   | 0            | 0.030             |
|           |             |             | 2-sites    | 44 | <div><div>8%</div></div>  | 1            | 0.041                                      | 0     | 0      | 0    | 0.056  | 0              | 0                   | -0.052     | 0                                               | 0             | 0.042 | 0.058  | 0        | 0            | 0                 |
|           |             | LH          | Continuous | 34 | <div><div>45%</div></div> | 4            | 0.041                                      | 0     | 0      | 0    | 0      | 0              | 0                   | -0.064     | 0                                               | 0             | 0.057 | 0.080  | 0        | 0            | 0.045             |
|           |             |             | Pulse      | 34 | <div><div>44%</div></div> | 3            | 0.041                                      | 0     | 0      | 0    | 0      | 0              | 0                   | -0.064     | 0                                               | 0             | 0.058 | 0.078  | 0        | 0            | 0.046             |
|           |             |             | Attachment | 47 | <div><div>39%</div></div> | 2            | 0                                          | 0.038 | 0      | 0    | 0      | 0.035          | 0                   | 0          | 0                                               | 0.031         | 0.050 | 0.054  | 0        | 0            | 0.038             |
|           |             |             | Straining  | 47 | <div><div>34%</div></div> | 2            | 0                                          | 0.037 | 0      | 0    | -0.030 | 0.029          | 0                   | 0          | 0                                               | 0.040         | 0.042 | 0.027  | 0        | 0.029        | 0.034             |
|           |             |             | 2-sites    | 44 | <div><div>13%</div></div> | 1            | 0                                          | 0     | 0      | 0    | 0.056  | 0              | 0                   | -0.053     | 0                                               | 0             | 0     | 0.052  | 0.034    | 0            | 0                 |
|           |             | MA2010      | Continuous | 34 | <div><div>33%</div></div> | 2            | 0.055                                      | 0     | 0      | 0    | 0      | 0              | 0                   | -0.042     | 0                                               | 0             | 0.069 | 0.076  | 0        | 0            | 0.050             |
|           |             |             | Pulse      | 34 | <div><div>35%</div></div> | 2            | 0.055                                      | 0     | 0      | 0    | 0      | 0              | 0                   | -0.041     | 0                                               | 0             | 0.070 | 0.074  | 0        | 0            | 0.051             |
|           |             |             | Attachment | 47 | <div><div>44%</div></div> | 2            | 0                                          | 0.037 | 0      | 0    | -0.038 | 0              | 0                   | 0          | 0                                               | 0.046         | 0.052 | 0.042  | 0        | 0            | 0.037             |
|           |             |             | Straining  | 47 | <div><div>36%</div></div> | 1            | 0                                          | 0.034 | 0      | 0    | -0.040 | 0              | 0                   | 0          | 0                                               | 0.047         | 0.041 | 0      | -0.031   | 0            | 0.031             |
|           |             |             | 2-sites    | 44 | <div><div>9%</div></div>  | 1            | 0.041                                      | 0     | 0      | 0    | 0.056  | 0              | 0                   | -0.052     | 0                                               | 0             | 0.041 | 0.057  | 0        | 0            | 0                 |
|           |             | NG          | Continuous | 34 | <div><div>31%</div></div> | 2            | 0.051                                      | 0     | 0      | 0    | 0      | 0              | 0                   | -0.044     | 0                                               | 0             | 0.070 | 0.076  | 0        | 0            | 0.051             |
|           |             |             | Pulse      | 34 | <div><div>33%</div></div> | 2            | 0.051                                      | 0     | 0      | 0    | 0      | 0              | 0                   | -0.043     | 0                                               | 0             | 0.071 | 0.074  | 0        | 0            | 0.053             |
|           |             |             | Attachment | 47 | <div><div>44%</div></div> | 2            | 0                                          | 0.040 | 0      | 0    | -0.038 | 0              | 0                   | 0          | 0                                               | 0.047         | 0.051 | 0.038  | 0        | 0            | 0.036             |
|           |             |             | Straining  | 47 | <div><div>36%</div></div> | 1            | 0                                          | 0.034 | 0      | 0    | -0.038 | 0              | 0                   | 0          | 0                                               | 0.045         | 0.038 | 0      | -0.030   | 0.027        | 0.029             |
|           |             |             | 2-sites    | 44 | <div><div>8%</div></div>  | 1            | 0.038                                      | 0     | 0      | 0    | 0.059  | 0              | 0                   | -0.053     | 0                                               | 0             | 0.042 | 0.056  | 0        | 0            | 0                 |
|           |             | MA2013      | Continuous | 34 | <div><div>30%</div></div> | 2            | 0.049                                      | 0     | 0      | 0    | 0      | 0              | 0                   | -0.044     | 0                                               | 0             | 0.071 | 0.076  | 0        | 0            | 0.051             |
|           |             |             | Pulse      | 34 | <div><div>32%</div></div> | 2            | 0.049                                      | 0     | 0      | 0    | 0      | 0              | 0                   | -0.043     | 0                                               | 0             | 0.073 | 0.074  | 0        | 0            | 0.053             |
|           |             |             | Attachment | 47 | <div><div>45%</div></div> | 2            | 0                                          | 0.041 | 0      | 0    | -0.039 | 0              | 0                   | 0          | 0                                               | 0.047         | 0.051 | 0.036  | 0        | 0            | 0.035             |
|           |             |             | Straining  | 47 | <div><div>36%</div></div> | 1            | 0                                          | 0.034 | 0      | 0    | -0.038 | 0              | 0                   | 0          | 0                                               | 0.045         | 0.038 | 0      | -0.030   | 0.027        | 0.028             |
|           |             |             | 2-sites    | 44 | <div><div>8%</div></div>  | 1            | 0.037                                      | 0     | 0      | 0    | 0.060  | 0              | 0                   | -0.053     | 0                                               | 0             | 0.044 | 0.055  | 0        | 0            | 0                 |



| Porosity | Diameter    | Correlation | Model      | n  | Total variance explained   | # components | Weights on first comp by NM and soil props |       |                               |       |                               |                               |                     |            | Weights on first comp by operational parameters |               |                               |                               |                               |              |                   |       |
|----------|-------------|-------------|------------|----|----------------------------|--------------|--------------------------------------------|-------|-------------------------------|-------|-------------------------------|-------------------------------|---------------------|------------|-------------------------------------------------|---------------|-------------------------------|-------------------------------|-------------------------------|--------------|-------------------|-------|
|          |             |             |            |    |                            |              | NM size                                    | pH    | Sand                          | Clay  | TOC                           | Zeta Potential                | Streaming Potential | Oxalate Fe | Oxalate Al                                      | Column length | C0                            | dc                            | $\theta$                      | Dispersivity | Approach velocity |       |
| Total    | Single d50  | TE          | Continuous | 34 | <div><div></div></div> 33% | 2            | <div><div></div></div> 0.056               | 0     | 0                             | 0     | 0                             | 0                             | 0                   | 0          | 0                                               | 0.061         | 0.068                         | 0                             | 0.000                         | 0.051        | 0.063             |       |
|          |             |             | Pulse      | 34 | <div><div></div></div> 35% | 2            | <div><div></div></div> 0.053               | 0     | 0                             | 0     | 0                             | 0                             | 0                   | 0          | 0                                               | 0.062         | 0.065                         | 0                             | 0                             | 0.059        | 0.061             |       |
|          |             |             | Attachment | 47 | <div><div></div></div> 44% | 2            | 0                                          | 0.027 | 0                             | 0     | <div><div></div></div> -0.028 | 0                             | 0                   | 0.037      | 0                                               | 0.039         | 0                             | <div><div></div></div> -0.027 | <div><div></div></div> -0.025 | 0.045        | 0                 |       |
|          |             |             | Straining  | 47 | <div><div></div></div> 36% | 1            | 0                                          | 0.027 | 0                             | 0     | <div><div></div></div> -0.032 | 0                             | 0                   | 0.040      | 0                                               | 0.042         | 0                             | 0                             | <div><div></div></div> -0.030 | 0.041        | 0                 |       |
|          |             |             | 2-sites    | 44 | <div><div></div></div> 8%  | 1            | 0                                          | 0     | <div><div></div></div> -0.035 | 0     | 0.043                         | 0                             | 0.044               | 0          | 0.040                                           | 0             | 0                             | 0                             | 0                             | 0.032        | 0                 |       |
|          |             | LH          | Continuous | 34 | <div><div></div></div> 39% | 3            | 0                                          | 0     | 0                             | 0     | 0.078                         | 0                             | 0                   | 0          | 0                                               | 0             | 0.071                         | 0                             | 0                             | 0.086        | 0.086             |       |
|          |             |             | Pulse      | 34 | <div><div></div></div> 40% | 3            | 0                                          | 0     | 0                             | 0     | 0.074                         | <div><div></div></div> -0.007 | 0                   | 0          | 0                                               | 0             | 0.068                         | 0                             | 0                             | 0.096        | 0.083             |       |
|          |             |             | Attachment | 47 | <div><div></div></div> 39% | 2            | 0                                          | 0.038 | 0                             | 0     | 0                             | 0                             | 0.037               | 0          | 0.038                                           | 0             | <div><div></div></div> -0.042 | 0                             | 0.063                         | 0            |                   |       |
|          |             |             | Straining  | 47 | <div><div></div></div> 34% | 2            | 0                                          | 0.038 | 0                             | 0     | 0                             | 0                             | 0.045               | 0          | 0.045                                           | 0             | <div><div></div></div> -0.037 | 0                             | 0.057                         | 0            |                   |       |
|          |             |             | 2-sites    | 44 | <div><div></div></div> 12% | 1            | 0                                          | 0     | <div><div></div></div> -0.036 | 0     | 0.047                         | 0                             | 0.042               | 0          | 0.039                                           | 0             | 0                             | 0                             | 0                             | 0.027        | 0                 |       |
|          |             | MA2010      | Continuous | 34 | <div><div></div></div> 33% | 2            | <div><div></div></div> 0.057               | 0     | 0                             | 0     | 0                             | 0                             | 0                   | 0          | 0                                               | 0.059         | 0.068                         | 0                             | 0                             | 0.052        | 0.064             |       |
|          |             |             | Pulse      | 34 | <div><div></div></div> 35% | 2            | <div><div></div></div> 0.054               | 0     | 0                             | 0     | 0                             | 0                             | 0                   | 0          | 0                                               | 0.060         | 0.065                         | 0                             | 0                             | 0.060        | 0.062             |       |
|          |             |             | Attachment | 47 | <div><div></div></div> 44% | 2            | 0                                          | 0.030 | 0                             | 0     | <div><div></div></div> -0.031 | 0                             | 0                   | 0.041      | 0                                               | 0.043         | 0                             | <div><div></div></div> -0.030 | 0                             | 0.050        | 0                 |       |
|          |             |             | Straining  | 47 | <div><div></div></div> 36% | 1            | 0                                          | 0.028 | 0                             | 0     | <div><div></div></div> -0.032 | 0                             | 0                   | 0.040      | 0                                               | 0.042         | 0                             | 0                             | <div><div></div></div> -0.030 | 0.041        | 0                 |       |
|          |             |             | 2-sites    | 44 | <div><div></div></div> 9%  | 1            | 0                                          | 0     | <div><div></div></div> -0.035 | 0     | 0.043                         | 0                             | 0.043               | 0          | 0.040                                           | 0             | 0                             | 0                             | 0                             | 0.032        | 0                 |       |
|          |             | NG          | Continuous | 34 | <div><div></div></div> 32% | 2            | <div><div></div></div> 0                   | 0     | 0                             | 0     | 0                             | 0                             | 0                   | 0          | 0                                               | 0.061         | 0.068                         | 0                             | 0                             | 0.054        | 0.063             |       |
|          |             |             | Pulse      | 34 | <div><div></div></div> 34% | 2            | <div><div></div></div> 0                   | 0     | 0                             | 0     | 0                             | 0                             | 0                   | 0          | 0                                               | 0.062         | 0.065                         | 0                             | 0                             | 0.061        | 0.061             |       |
|          |             |             | Attachment | 47 | <div><div></div></div> 44% | 2            | 0                                          | 0.027 | 0                             | 0     | <div><div></div></div> -0.028 | 0                             | 0                   | 0.037      | 0                                               | 0.039         | 0                             | <div><div></div></div> -0.027 | <div><div></div></div> -0.025 | 0.045        | 0                 |       |
|          |             |             | Straining  | 47 | <div><div></div></div> 36% | 1            | 0                                          | 0.027 | 0                             | 0     | <div><div></div></div> -0.032 | 0                             | 0                   | 0.040      | 0                                               | 0.042         | 0                             | 0                             | <div><div></div></div> -0.030 | 0.041        | 0                 |       |
|          |             |             | 2-sites    | 44 | <div><div></div></div> 8%  | 1            | 0                                          | 0     | <div><div></div></div> -0.035 | 0     | 0.043                         | 0                             | 0.043               | 0          | 0.040                                           | 0             | 0                             | 0                             | 0                             | 0.033        | 0                 |       |
|          |             | MA2013      | Continuous | 34 | <div><div></div></div> 32% | 2            | <div><div></div></div> 0.051               | 0     | 0                             | 0     | 0                             | 0                             | 0                   | 0          | 0                                               | 0.060         | 0.069                         | 0                             | 0                             | 0.055        | 0.063             |       |
|          |             |             | Pulse      | 34 | <div><div></div></div> 34% | 2            | <div><div></div></div> 0.047               | 0     | 0                             | 0     | 0                             | 0                             | 0                   | 0          | 0                                               | 0.061         | 0.066                         | 0                             | 0                             | 0.062        | 0.061             |       |
|          |             |             | Attachment | 47 | <div><div></div></div> 44% | 2            | 0                                          | 0.030 | 0                             | 0     | <div><div></div></div> -0.031 | 0                             | 0                   | 0.041      | 0                                               | 0.043         | 0                             | <div><div></div></div> -0.030 | 0                             | 0.050        | 0                 |       |
|          |             |             | Straining  | 47 | <div><div></div></div> 36% | 1            | 0                                          | 0.028 | 0                             | 0     | <div><div></div></div> -0.032 | 0                             | 0                   | 0.040      | 0                                               | 0.042         | 0                             | 0                             | <div><div></div></div> -0.030 | 0.041        | 0                 |       |
|          |             |             | 2-sites    | 44 | <div><div></div></div> 8%  | 1            | 0                                          | 0     | <div><div></div></div> -0.035 | 0     | 0.044                         | 0                             | 0.043               | 0          | 0.040                                           | 0             | 0                             | 0                             | 0                             | 0.032        | 0                 |       |
|          | Distributed | TE          | Continuous | 34 | <div><div></div></div> 33% | 2            | <div><div></div></div> 0.056               | 0     | 0                             | 0     | 0                             | <div><div></div></div> -0.020 | 0                   | 0          | 0                                               | 0.056         | 0.070                         | <div><div></div></div> -0.050 | 0                             | 0.077        | 0.071             |       |
|          |             |             | Pulse      | 34 | <div><div></div></div> 34% | 2            | <div><div></div></div> 0.052               | 0     | 0                             | 0     | 0                             | <div><div></div></div> -0.016 | 0                   | 0          | 0                                               | 0.055         | 0.065                         | <div><div></div></div> -0.053 | 0                             | 0.083        | 0.068             |       |
|          |             |             | Attachment | 47 | <div><div></div></div> 44% | 2            | 0                                          | 0     | 0                             | 0     | 0                             | 0                             | 0                   | 0.047      | 0                                               | 0.041         | 0                             | <div><div></div></div> -0.059 | 0                             | 0.060        | 0                 |       |
|          |             |             | Straining  | 47 | <div><div></div></div> 36% | 1            | 0                                          | 0     | 0                             | 0     | 0                             | 0                             | 0                   | 0.052      | 0                                               | 0.045         | 0                             | <div><div></div></div> -0.056 | 0                             | 0.052        | 0                 |       |
|          |             |             | 2-sites    | 44 | <div><div></div></div> 8%  | 1            | 0                                          | 0     | <div><div></div></div> -0.035 | 0.029 | 0                             | 0                             | 0.033               | 0          | 0.034                                           | 0.030         | 0                             | 0                             | 0                             | 0.052        | 0.030             |       |
|          |             | LH          | Continuous | 34 | <div><div></div></div> 39% | 3            | 0                                          | 0     | 0                             | 0     | 0                             | <div><div></div></div> -0.010 | 0                   | 0          | 0                                               | 0             | 0                             | 0.059                         | <div><div></div></div> -0.046 | 0            | 0.109             | 0.089 |
|          |             |             | Pulse      | 34 | <div><div></div></div> 40% | 3            | 0                                          | 0     | 0                             | 0     | 0                             | -0.006                        | 0                   | 0          | 0                                               | 0             | 0.055                         | <div><div></div></div> -0.050 | 0                             | 0.113        | 0.083             |       |
|          |             |             | Attachment | 47 | <div><div></div></div> 40% | 2            | 0                                          | 0     | 0                             | 0     | 0                             | 0                             | 0.040               | 0          | 0.041                                           | 0             | 0                             | <div><div></div></div> -0.054 | 0                             | 0.060        | 0                 |       |
|          |             |             | Straining  | 47 | <div><div></div></div> 34% | 2            | 0                                          | 0     | 0                             | 0     | 0                             | 0                             | 0.032               | 0.039      | 0.033                                           | 0.032         | 0                             | <div><div></div></div> -0.049 | 0                             | 0.050        | 0                 |       |
|          |             |             | 2-sites    | 44 | <div><div></div></div> 12% | 1            | 0                                          | 0     | <div><div></div></div> -0.037 | 0.030 | 0                             | 0                             | 0.033               | 0          | 0.034                                           | 0             | 0                             | 0                             | 0                             | 0.047        | 0.026             |       |
|          |             | MA2010      | Continuous | 34 | <div><div></div></div> 33% | 2            | <div><div></div></div> 0.058               | 0     | 0                             | 0     | 0                             | <div><div></div></div> -0.020 | 0                   | 0          | 0                                               | 0.053         | 0.070                         | <div><div></div></div> -0.049 | 0                             | 0.078        | 0.072             |       |
|          |             |             | Pulse      | 34 | <div><div></div></div> 35% | 2            | <div><div></div></div> 0.054               | 0     | 0                             | 0     | 0                             | <div><div></div></div> -0.016 | 0                   | 0          | 0                                               | 0.053         | 0.066                         | <div><div></div></div> -0.053 | 0                             | 0.085        | 0.068             |       |
|          |             |             | Attachment | 47 | <div><div></div></div> 44% | 2            | 0                                          | 0     | 0                             | 0     | 0                             | 0                             | 0                   | 0.046      | 0                                               | 0.041         | 0                             | <div><div></div></div> -0.059 | 0                             | 0.060        | 0                 |       |
|          |             |             | Straining  | 47 | <div><div></div></div> 36% | 1            | 0                                          | 0     | 0                             | 0     | 0                             | 0                             | 0                   | 0.052      | 0                                               | 0.045         | 0                             | <div><div></div></div> -0.056 | 0                             | 0.053        | 0                 |       |
|          |             |             | 2-sites    | 44 | <div><div></div></div> 9%  | 1            | 0                                          | 0     | <div><div></div></div> -0.036 | 0.029 | 0                             | 0                             | 0.033               | 0          | 0.034                                           | 0.029         | 0                             | 0                             | 0                             | 0.051        | 0.030             |       |
|          |             | NG          | Continuous | 34 | <div><div></div></div> 32% | 2            | <div><div></div></div> 0.051               | 0     | 0                             | 0     | 0                             | <div><div></div></div> -0.020 | 0                   | 0          | 0                                               | 0.055         | 0.069                         | <div><div></div></div> -0.052 | 0                             | 0.079        | 0.070             |       |
|          |             |             | Pulse      | 34 | <div><div></div></div> 34% | 2            | <div><div></div></div> 0.047               | 0     | 0                             | 0     | 0                             | <div><div></div></div> -0.016 | 0                   | 0          | 0                                               | 0.055         | 0.064                         | <div><div></div></div> -0.055 | 0                             | 0.086        | 0.066             |       |
|          |             |             | Attachment | 47 | <div><div></div></div> 44% | 2            | 0                                          | 0     | 0                             | 0     | 0                             | 0                             | 0                   | 0.046      | 0                                               | 0.041         | 0                             | <div><div></div></div> -0.059 | 0                             | 0.060        | 0                 |       |
|          |             |             | Straining  | 47 | <div><div></div></div> 36% | 1            | 0                                          | 0     | 0                             | 0     | 0                             | 0                             | 0                   | 0.052      | 0                                               | 0.045         | 0                             | <div><div></div></div> -0.056 | 0                             | 0.053        | 0                 |       |
|          |             |             | 2-sites    | 44 | <div><div></div></div> 8%  | 1            | 0                                          | 0     | <div><div></div></div> -0.035 | 0.029 | 0                             | 0                             | 0.033               | 0          | 0.034                                           | 0.030         | 0                             | 0                             | 0                             | 0.052        | 0.030             |       |
|          |             | MA2013      | Continuous | 34 | <div><div></div></div> 32% | 2            | <div><div></div></div> 0.051               | 0     | 0                             | 0     | 0                             | <div><div></div></div> -0.019 | 0                   | 0          | 0                                               | 0.053         | 0.069                         | <div><div></div></div> -0.052 | 0                             | 0.082        | 0.071             |       |
|          |             |             | Pulse      | 34 | <div><div></div></div> 34% | 2            | <div><div></div></div> 0.047               | 0     | 0                             | 0     | 0                             | <div><div></div></div> -0.016 | 0                   | 0          | 0                                               | 0.052         | 0.065                         | <div><div></div></div> -0.055 | 0                             | 0.088        | 0.067             |       |
|          |             |             | Attachment | 47 | <div><div></div></div> 44% | 2            | 0                                          | 0     | 0                             | 0     | 0                             | 0                             | 0                   | 0.046      | 0                                               | 0.040         | 0                             | <div><div></div></div> -0.059 | 0                             | 0.060        | 0                 |       |
|          |             |             | Straining  | 47 | <div><div></div></div> 36% | 1            | 0                                          | 0     | 0                             | 0     | 0                             | 0                             | 0                   | 0.052      | 0                                               | 0.045         | 0                             | <div><div></div></div> -0.056 | 0                             | 0.053        | 0                 |       |
|          |             |             | 2-sites    | 44 | <div><div></div></div> 9%  | 1            | 0                                          | 0     | <div><div></div></div> -0.036 | 0.029 | 0                             | 0                             | 0.033               | 0          | 0.034                                           | 0.029         | 0                             | 0                             | 0                             | 0.052        | 0.029             |       |

# All metadata

Table S6. All metadata of the column experiments

|    | Soil        | Column length | Flow rate            | Total porosity | effective porosity | NP core           | NP size | C <sub>0</sub>      | mass recovery | Dis-persivity |
|----|-------------|---------------|----------------------|----------------|--------------------|-------------------|---------|---------------------|---------------|---------------|
|    |             | cm            | mL min <sup>-1</sup> | -              | -                  | -                 | nm      | mg kg <sup>-1</sup> | -             | cm            |
| 1  | Chiltern    | 4.6           | 0.2219               | 0.645          | 0.3049             | Au                | 80      | 3.96                | 0.0594        | 1.214         |
| 2  | Chiltern    | 2.7           | 0.4000               | 0.580          | 0.5305             | Au                | 20      | 1.56                | 0.7320        | 0.1487        |
| 3  | Chiltern    | 3.3           | 0.4000               | 0.654          | 0.5575             | Ag <sub>2</sub> S | 27      | 2.08                | 0.0214        | 0.6874        |
| 4  | Chiltern    | 3.3           | 0.4000               | 0.689          | 0.5582             | Au                | 20      | 1.68                | 0.8607        | 0.3264        |
| 5  | Chiltern    | 2.7           | 0.4000               | 0.636          | 0.5366             | Au                | 80      | 1.23                | 1.0703        | 0.4772        |
| 6  | Chiltern    | 3.7           | 0.4000               | 0.632          | 0.4939             | Ag <sub>2</sub> S | 27      | 1.66                | 0.0912        | 0.5906        |
| 7  | Dorset      | 3.8           | 0.2563               | 0.557          | 0.2365             | Au                | 80      | 2.65                | 0.1411        | 9.80E-02      |
| 8  | Dorset      | 3.7           | 0.4000               | 0.566          | 0.3852             | Au                | 20      | 1.10                | 1.0123        | 0.2138        |
| 9  | Dorset      | 3.3           | 0.4000               | 0.556          | 0.4324             | Ag <sub>2</sub> S | 27      | 2.45                | 0.6888        | 0.1143        |
| 10 | Lufa 2.2    | 6             | 0.4183               | 0.488          | 0.5377             | Au                | 20      | 23.22               | 0.1401        | 0.3212        |
| 11 | Lufa 2.2    | 5.4           | 0.5522               | 0.560          | 0.5414             | Au                | 80      | 296.47              | 0.3697        | 0.3973        |
| 12 | Lufa 2.2    | 4.3           | 0.5564               | 0.561          | 0.5953             | Au                | 80      | 16.46               | 0.6169        | 0.1152        |
| 13 | Lufa 2.2    | 4.2           | 0.5241               | 0.568          | 0.4997             | Au                | 20      | 95.92               | 0.6267        | 0.1486        |
| 14 | Lufa 2.2    | 3.8           | 0.3730               | 0.579          | 0.5687             | Au                | 80      | 4.22                | 1.4660        | 0.08604       |
| 15 | Lufa 2.2    | 3.9           | 0.4935               | 0.519          | 0.4888             | Au                | 80      | 1.65                | 0.6351        | 0.07586       |
| 16 | Lufa 2.2    | 4.25          | 0.3780               | 0.559          | 0.5047             | Au                | 20      | 22.79               | 1.0373        | 0.1732        |
| 17 | Lufa 2.2    | 3.5           | 0.3914               | 0.552          | 0.4621             | Au                | 80      | 36.98               | 1.6653        | 0.04795       |
| 18 | Lufa 2.2    | 3.8           | 0.3863               | 0.580          | 0.4602             | Au                | 80      | 8.46                | 2.7883        | 0.08915       |
| 19 | Lufa 2.2    | 3.9           | 0.3685               | 0.584          | 0.4378             | Au                | 80      | 6.02                | 2.3583        | 0.1259        |
| 20 | Lufa 2.2    | 4.7           | 0.6000               | 0.542          | 0.4726             | Au                | 20      | 4.61                | 0.9923        | 0.1405        |
| 21 | Lufa 2.2    | 4.7           | 0.6000               | 0.529          | 0.5147             | Au                | 20      | 0.96                | 1.2126        | 0.1136        |
| 22 | Lufa 2.2    | 3.5           | 0.4000               | 0.532          | 0.4115             | Ag <sub>2</sub> S | 27      | 0.83                | 0.9186        | 0.3718        |
| 23 | Lufa 2.2    | 4.6           | 0.4000               | 0.526          | 0.4266             | Au                | 80      | 1.39                | 1.2222        | 0.2097        |
| 24 | Lufa 2.2    | 3.8           | 0.4000               | 0.516          | 0.5325             | Ag <sub>2</sub> S | 27      | 0.99                | 1.1797        | 0.2454        |
| 25 | Lufa 2.2    | 4.6           | 0.5230               | 0.571961347    | 0.5798             | Au                | 80      | 12.65               | 0.4892        | 0.08169       |
| 26 | Lufa 2.2    | 3.9           | 0.1924               | 0.550248425    | 0.3926             | Au                | 80      | 2.49                | 0.9971        | 0.07876       |
| 27 | Lufa 2.2    | 3.9           | 0.4087               | 0.594857515    | 0.3883             | Au                | 80      | 14.04               | 0.4311        | 0.08378       |
| 28 | Lufa 2.2    | 3.4           | 0.2149               | 0.571549742    | 0.4593             | Au                | 20      | 24.01               | 1.2664        | 0.05004       |
| 29 | Lufa 2.2    | 3.9           | 0.4218               | 0.546435236    | 0.3747             | Au                | 20      | 17.31               | 0.0276        | 0.1172        |
| 30 | Lufa 2.2    | 3.8           | 0.4000               | 0.555829373    | 0.8381             | Au                | 20      | 1.17                | 1.1578        | 0.2137        |
| 31 | Lufa 2.2    | 3.8           | 0.4000               | 0.555829373    | 0.5188             | Au                | 20      | 1.17                | 1.2704        | 0.1565        |
| 32 | Lufa 2.2    | 4.6           | 0.5564               | 0.54826802     | 0.587              | Au                | 80      | 4.60                | NA            | 0.1474        |
| 33 | North Wales | 4             | 0.4000               | 0.672626987    | 0.60006            | Au                | 80      | 4.50                | 0.4643        | 0.1275        |
| 34 | North Wales | 3.5           | 0.4000               | 0.573          | 0.6047             | Au                | 20      | 1.53                | 1.4618        | 0.1069        |
| 35 | North Wales | 2.8           | 0.4000               | 0.665          | 0.8319             | Ag <sub>2</sub> S | 27      | 1.71                | 0.7328        | 0.06512       |
| 36 | Woburn      | 6             | 0.5662               | 0.447          | 0.4928             | Au                | 20      | 20.22               | 0.0050        | 0.3164        |
| 37 | Woburn      | 5.7           | 0.5250               | 0.445          | 0.467              | Au                | 20      | 8.79                | 0.0322        | 0.3123        |
| 38 | Woburn      | 5.4           | 0.5753               | 0.469          | 0.54               | Au                | 20      | 18.07               | 0.0059        | 0.35          |
| 39 | Woburn      | 5.7           | 0.5667               | 0.449          | 0.3694             | Au                | 20      | 0.68                | 0.1974        | 1.113         |
| 40 | Woburn      | 5.7           | 0.5615               | 0.394          | 0.5232             | Au                | 80      | 14.41               | 0.0018        | 2.38E-01      |
| 41 | Woburn      | 5.5           | 0.6122               | 0.369          | 0.4603             | Au                | 80      | 5.92                | 0.0023        | 0.1535        |

|    |        |     |        |       |         |                   |    |       |        |          |
|----|--------|-----|--------|-------|---------|-------------------|----|-------|--------|----------|
| 42 | Woburn | 5.4 | 0.2177 | 0.369 | 0.4849  | Au                | 20 | 5.27  | 0.0250 | 0.206    |
| 43 | Woburn | 5.6 | 0.4229 | 0.381 | 0.4381  | Au                | 20 | 7.10  | 0.0280 | 0.1834   |
| 44 | Woburn | 5.3 | 0.4103 | 0.376 | 0.4304  | Au                | 80 | 6.67  | 0.2440 | 0.125    |
| 45 | Woburn | 5.9 | 0.1600 | 0.364 | 0.4141  | Au                | 20 | 25.46 | 0.0281 | 0.1214   |
| 46 | Woburn | 5.8 | 0.3703 | 0.358 | 0.501   | Au                | 80 | 8.77  | 0.0004 | 0.1318   |
| 47 | Woburn | 6.3 | 0.6172 | 0.477 | 0.5589  | Au                | 20 | 33.95 | 0.0021 | 2.71E-01 |
| 48 | Woburn | 5.5 | 0.4580 | 0.455 | 0.39999 | Au                | 20 | 35.81 | 2.8710 | 9.88E-02 |
| 49 | Woburn | 3.7 | 0.3386 | 0.519 | 0.3629  | Au                | 80 | 0.09  | 1.0127 | 0.1354   |
| 50 | Woburn | 4.3 | 0.4000 | 0.521 | 0.5032  | Au                | 20 | 0.98  | 0.9998 | 0.07877  |
| 51 | Woburn | 4.1 | 0.4000 | 0.503 | 0.3813  | Ag <sub>2</sub> S | 27 | 1.28  | 0.5075 | 0.1439   |



## References

1. N. Tufenkji and M. Elimelech, *Environ. Sci. Technol.*, 2004, **38**, 529-536.
2. H. Ma, J. Pedel, P. Fife and W. P. Johnson, *Environ. Sci. Technol.*, 2009, **43**, 8573-8579.
3. H. Ma, J. Pedel, P. Fife and W. P. Johnson, *Environ. Sci. Technol.*, 2010, **44**, 4383-4383.
4. W. Long and M. Hilpert, *Environ. Sci. Technol.*, 2009, **43**, 4419-4424.
5. K. E. Nelson and T. R. Ginn, *Water Resources Research*, 2011, **47**.
6. H. Ma, M. Hradisky and W. P. Johnson, *Environ. Sci. Technol.*, 2013, **47**, 2272-2278.
7. M. Elimelech, J. Gregory, X. Jia and R. A. Williams, *Particle deposition and aggregation: measurement, modelling and simulation*, Butterworth Heinemann, Woburn, USA, 1995.
8. D. L. Sparks, A. L. Page, P. A. Helmke and R. H. Loeppert, *Methods of Soil Analysis Part 3—Chemical Methods*, Soil Science Society of America, American Society of Agronomy, Madison, WI, 1996.
9. L. van Reeuwijk, *Procedures for Soil Analysis - sixth edition*, ISRIC, Wageningen, the Netherlands, 2002.
10. L. C. Blakemore, P. L. Searle and B. K. Daly, *Methods for chemical analysis of soils*, New Zealand Soil Bureau, Lower Hutt, New Zealand, 1987.
11. O. Omotoso, D. K. McCarty, S. Hillier and R. Kleeberg, *Clays and Clay Minerals*, 2006, **54**, 748-760.
